# Supplementary material
Source: PubMed Central journal article supplement (PMC7572828)

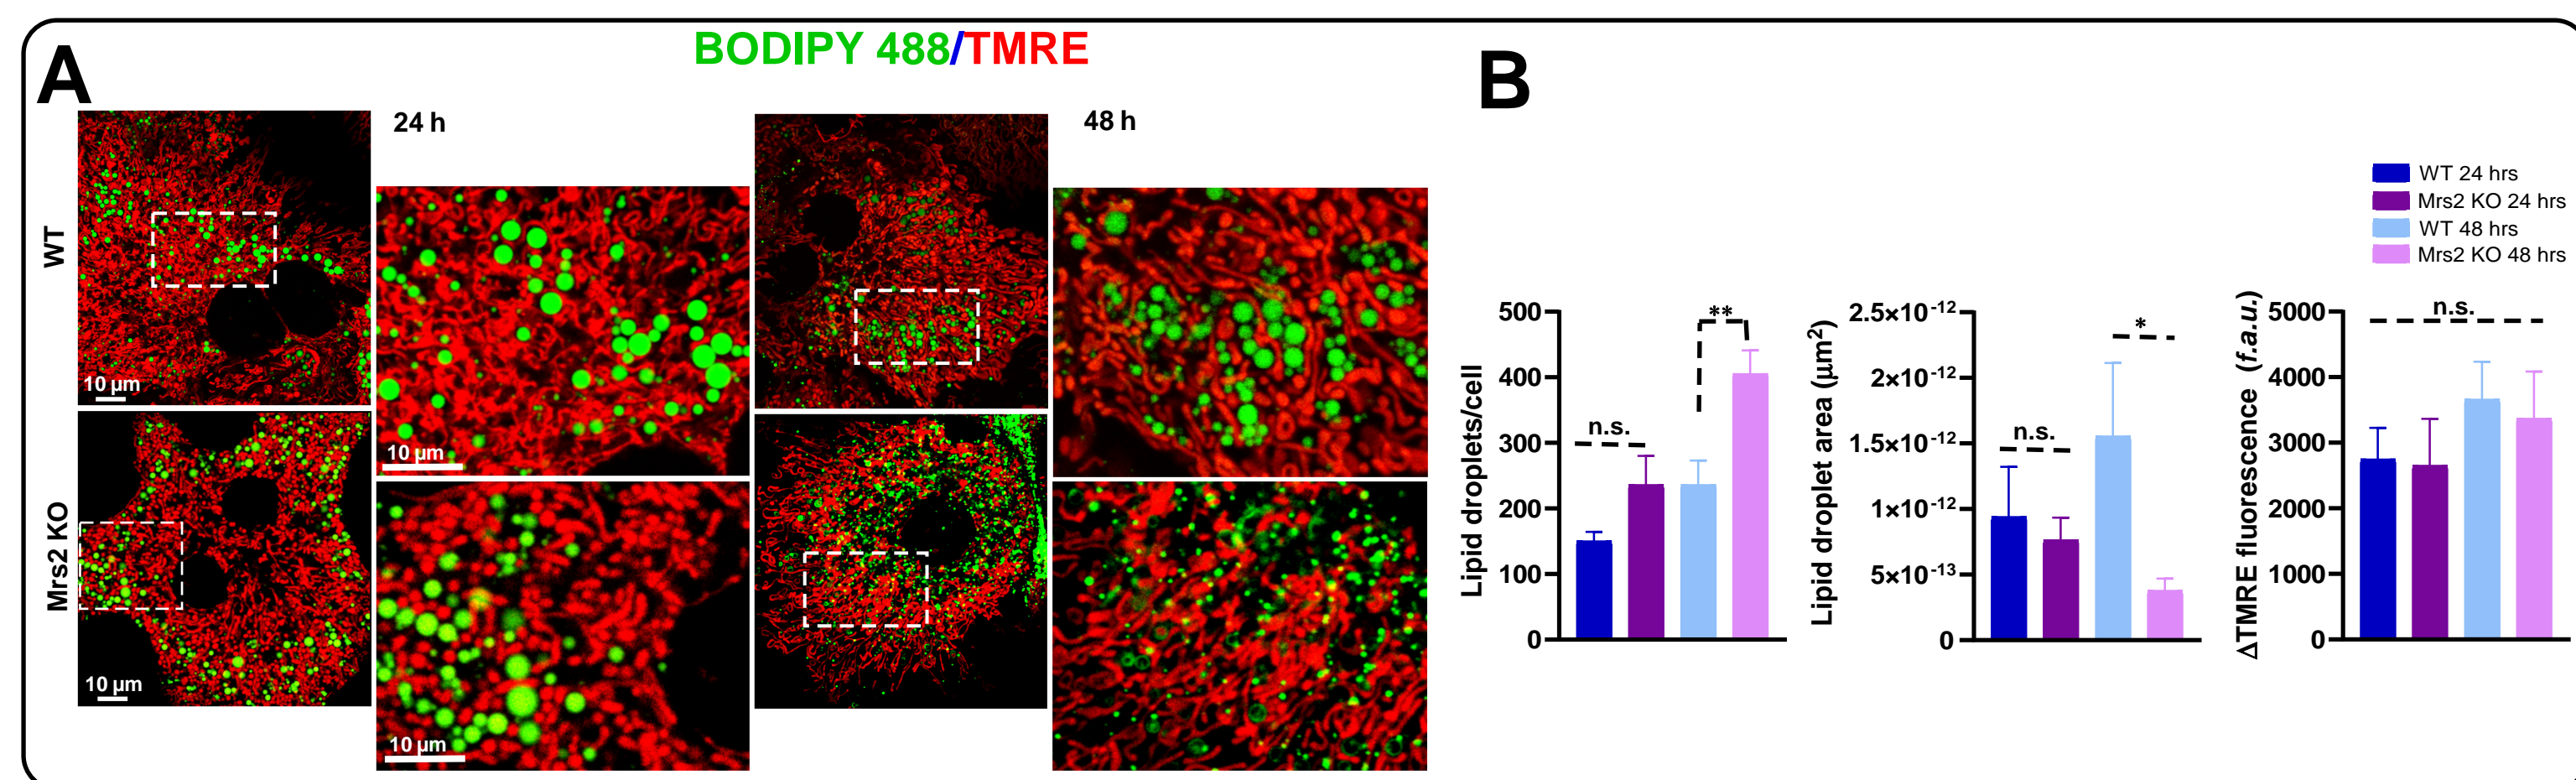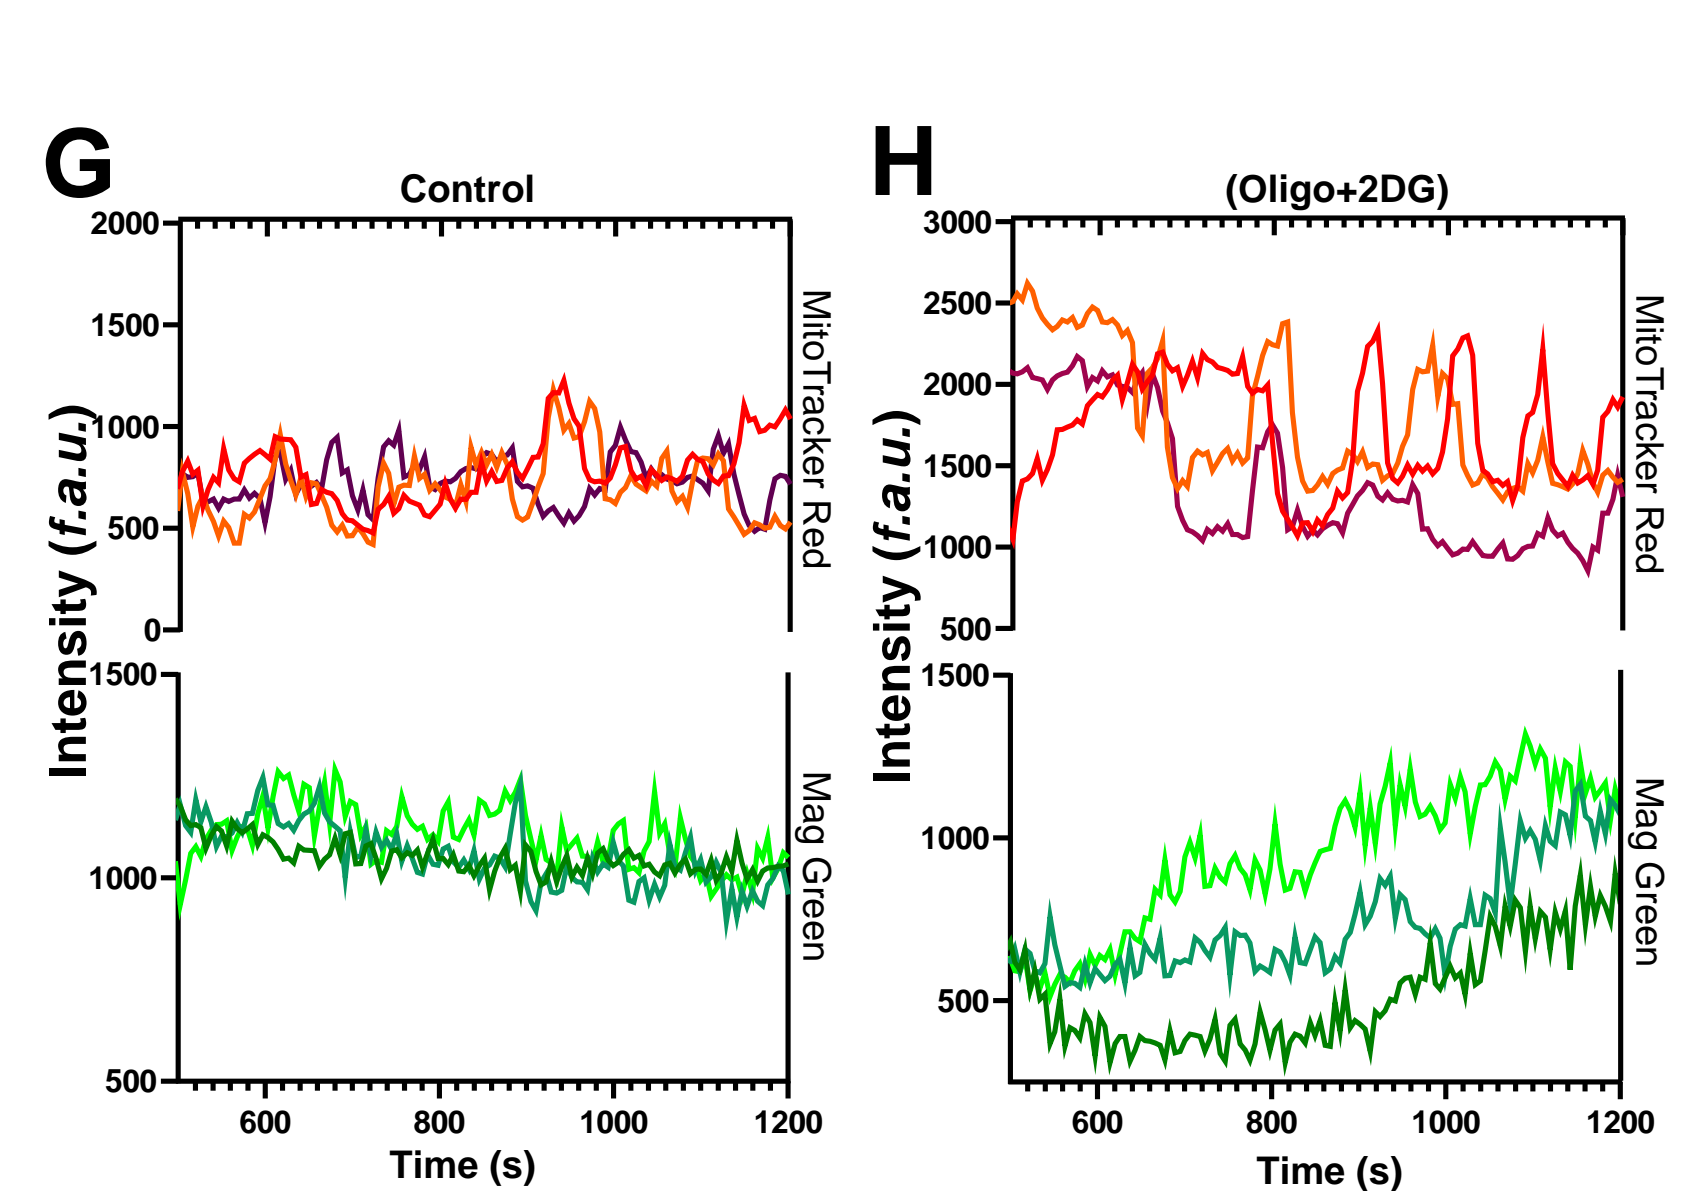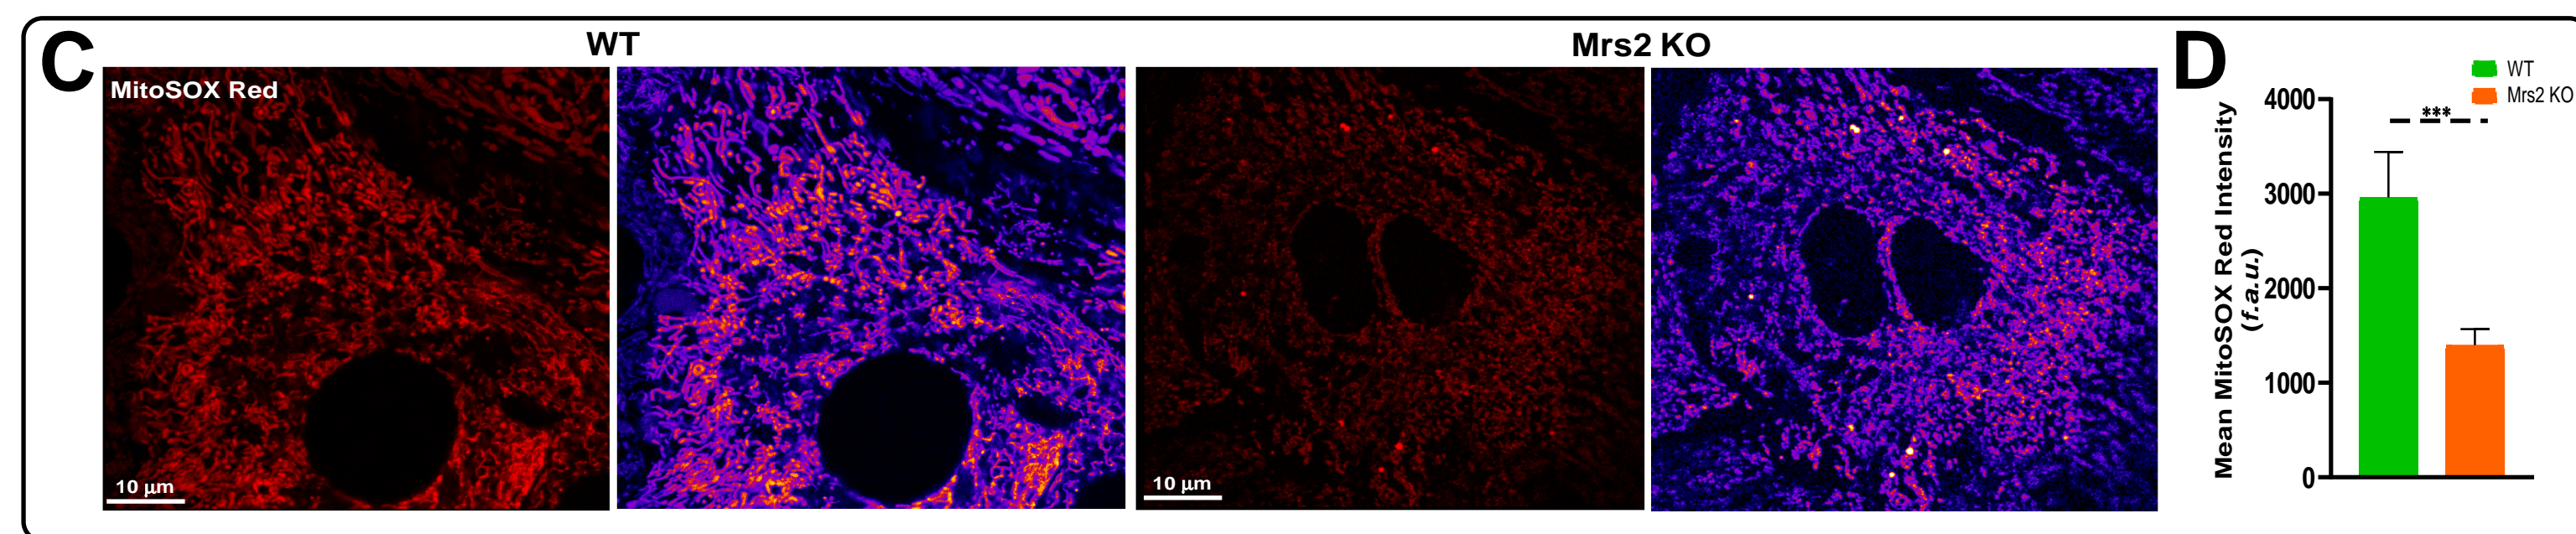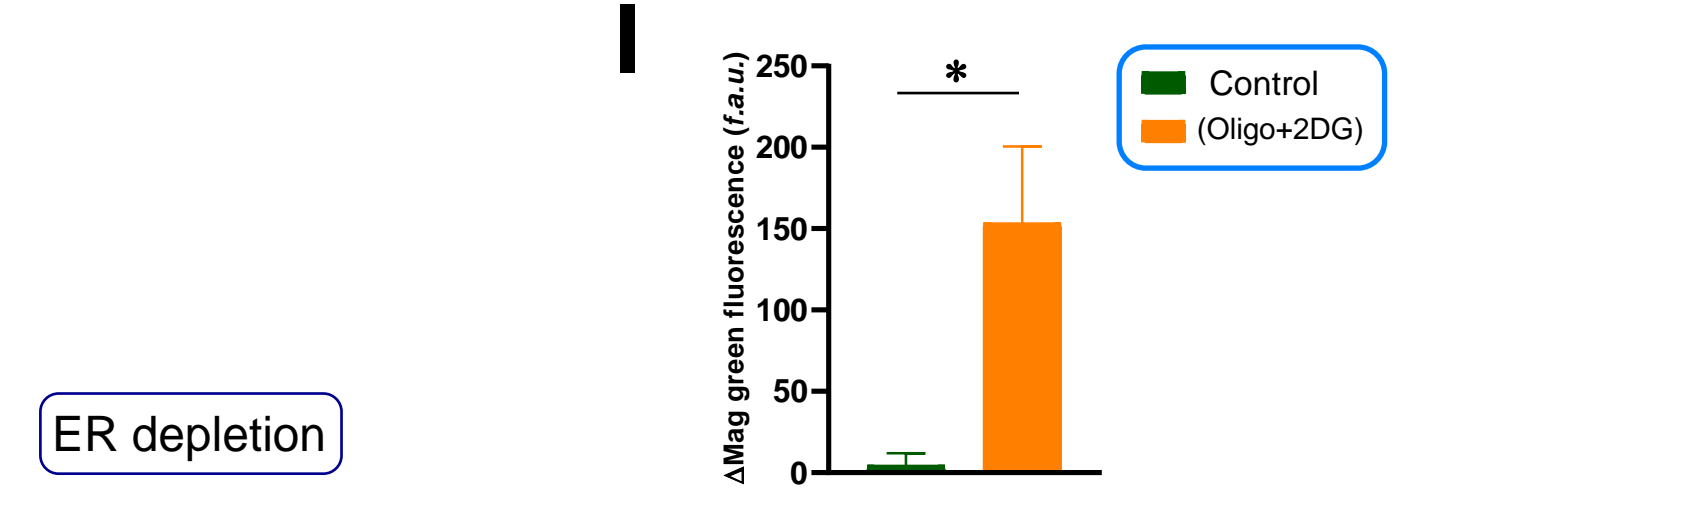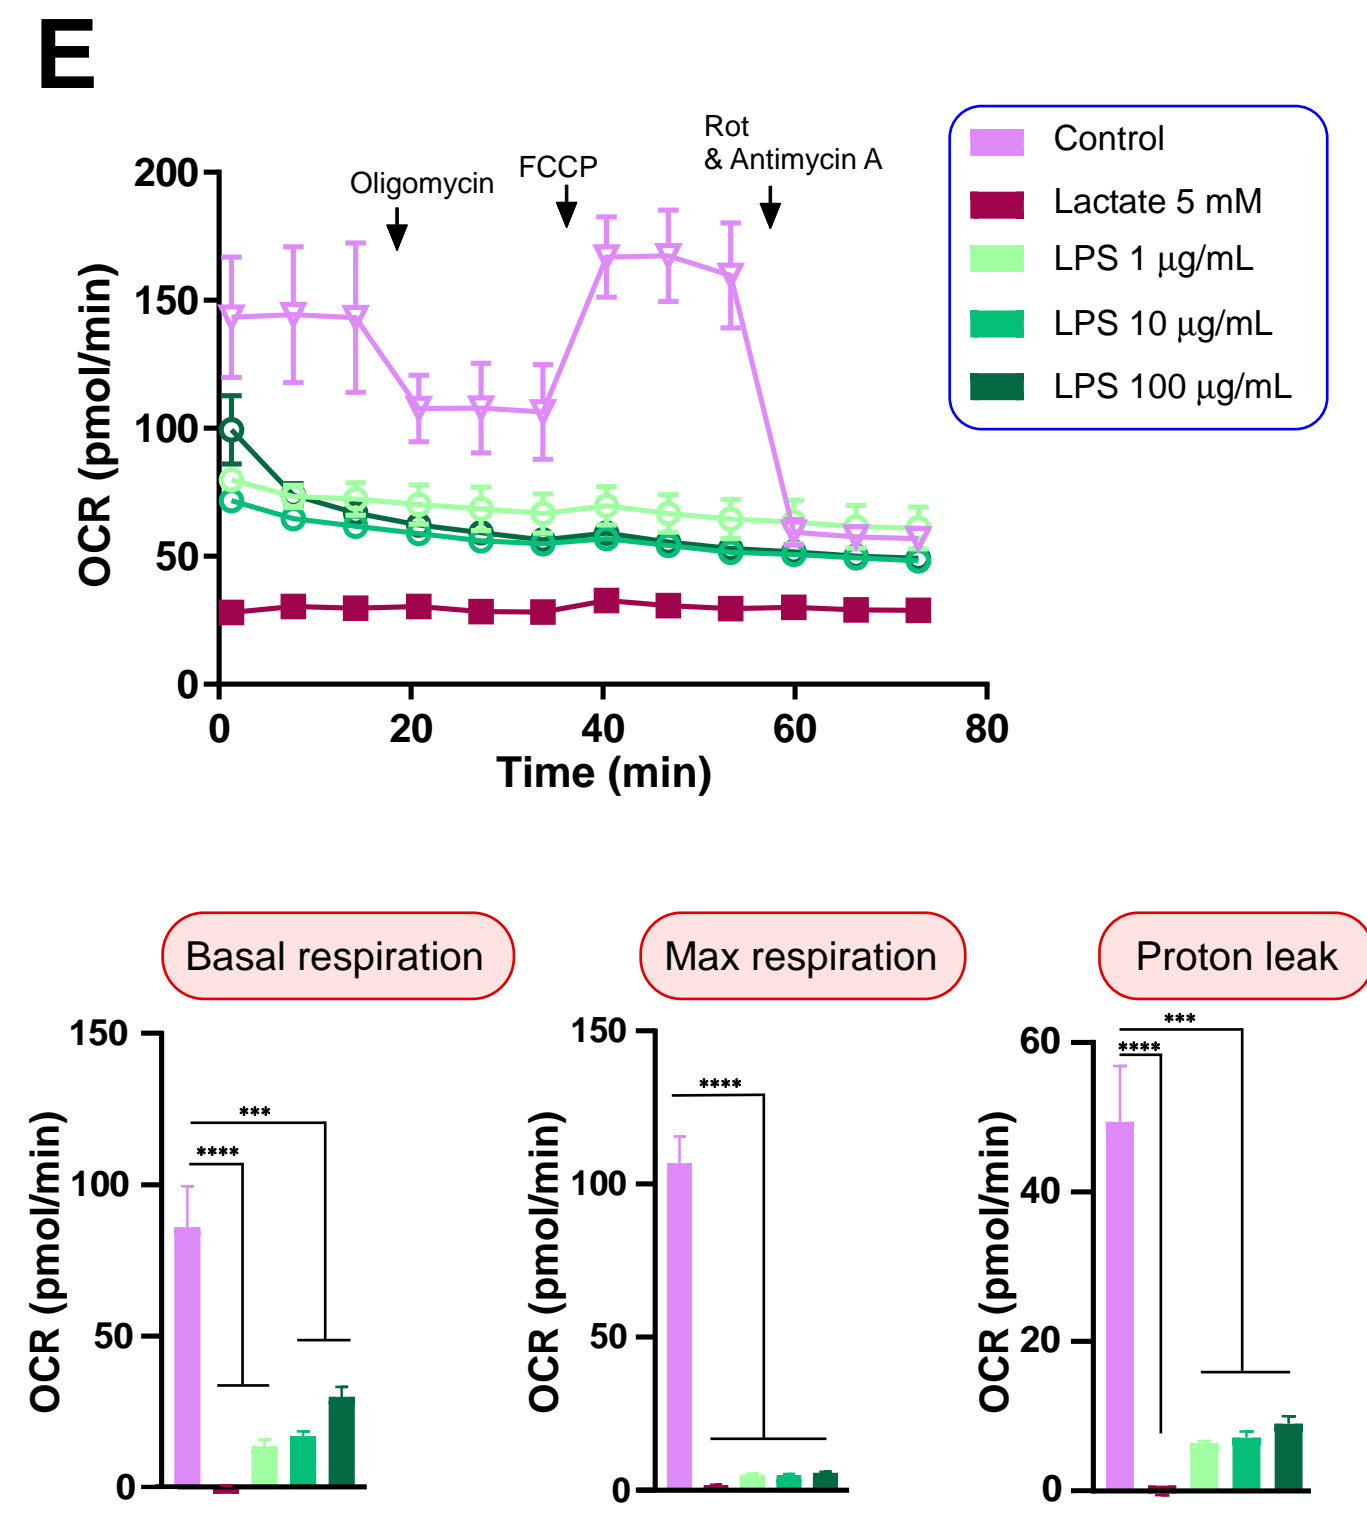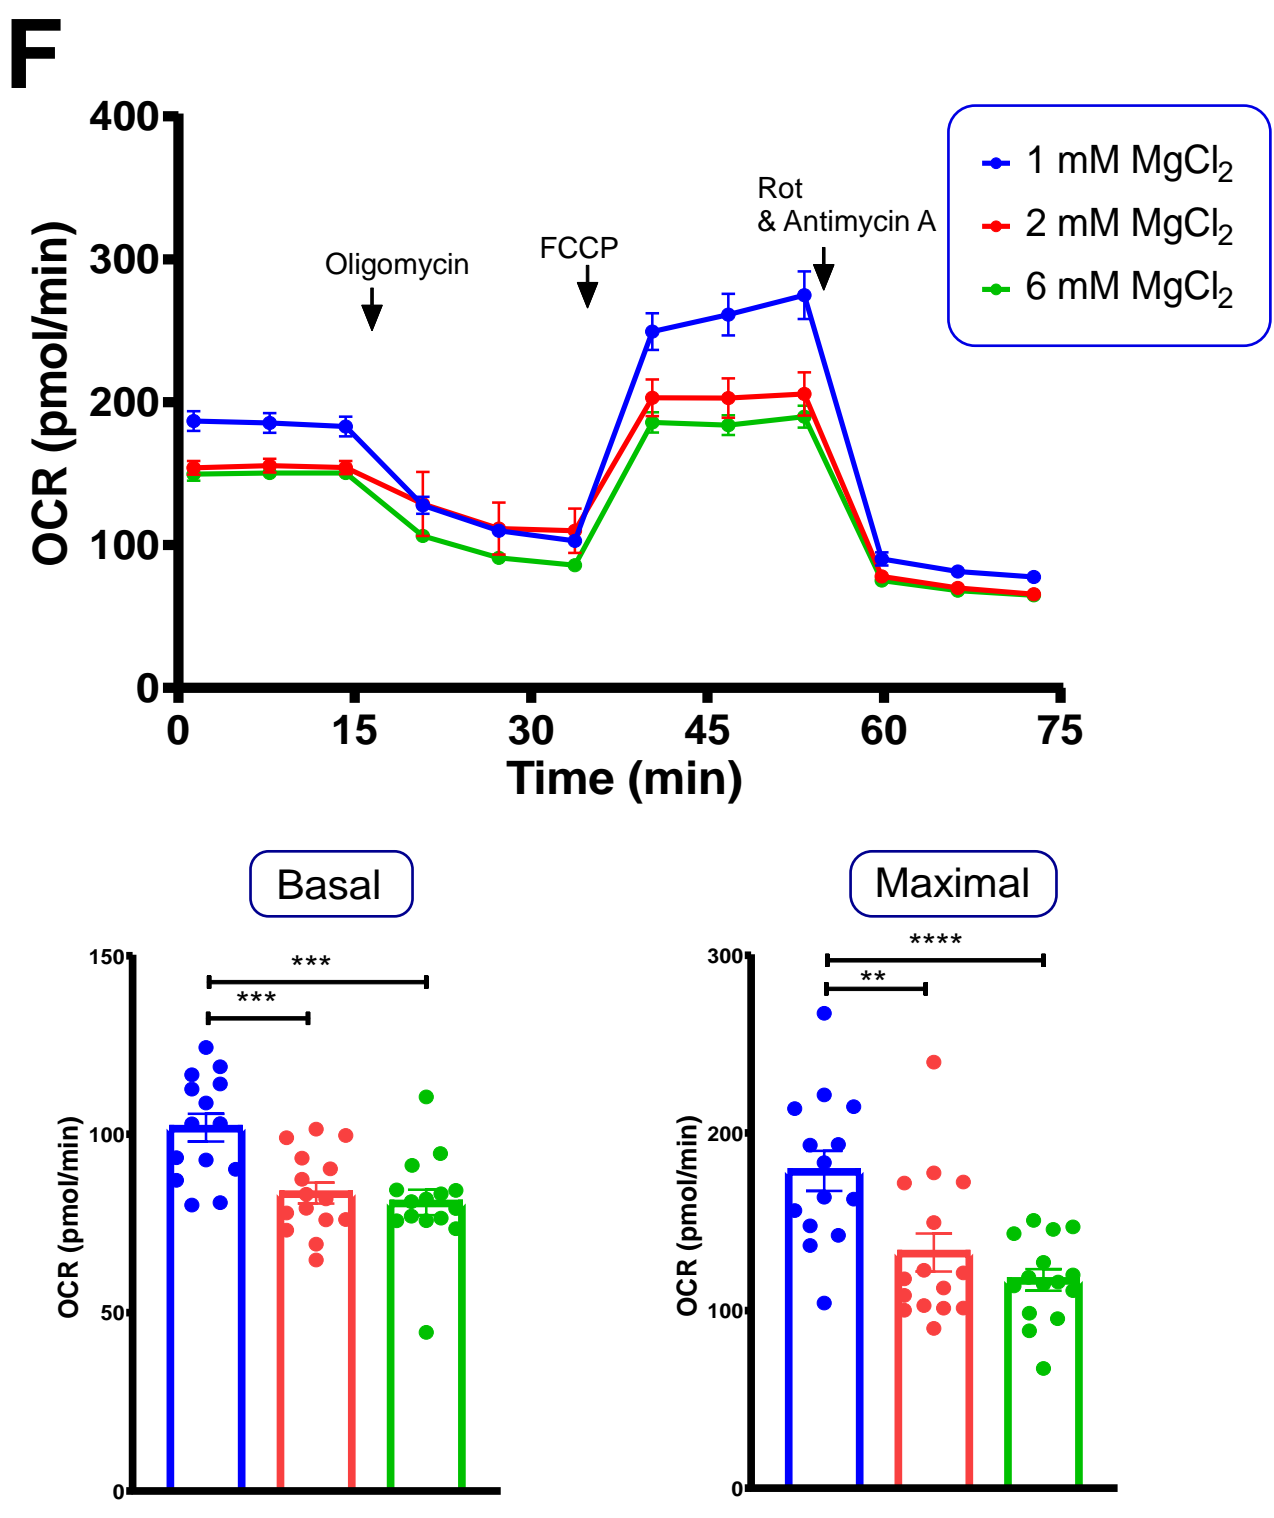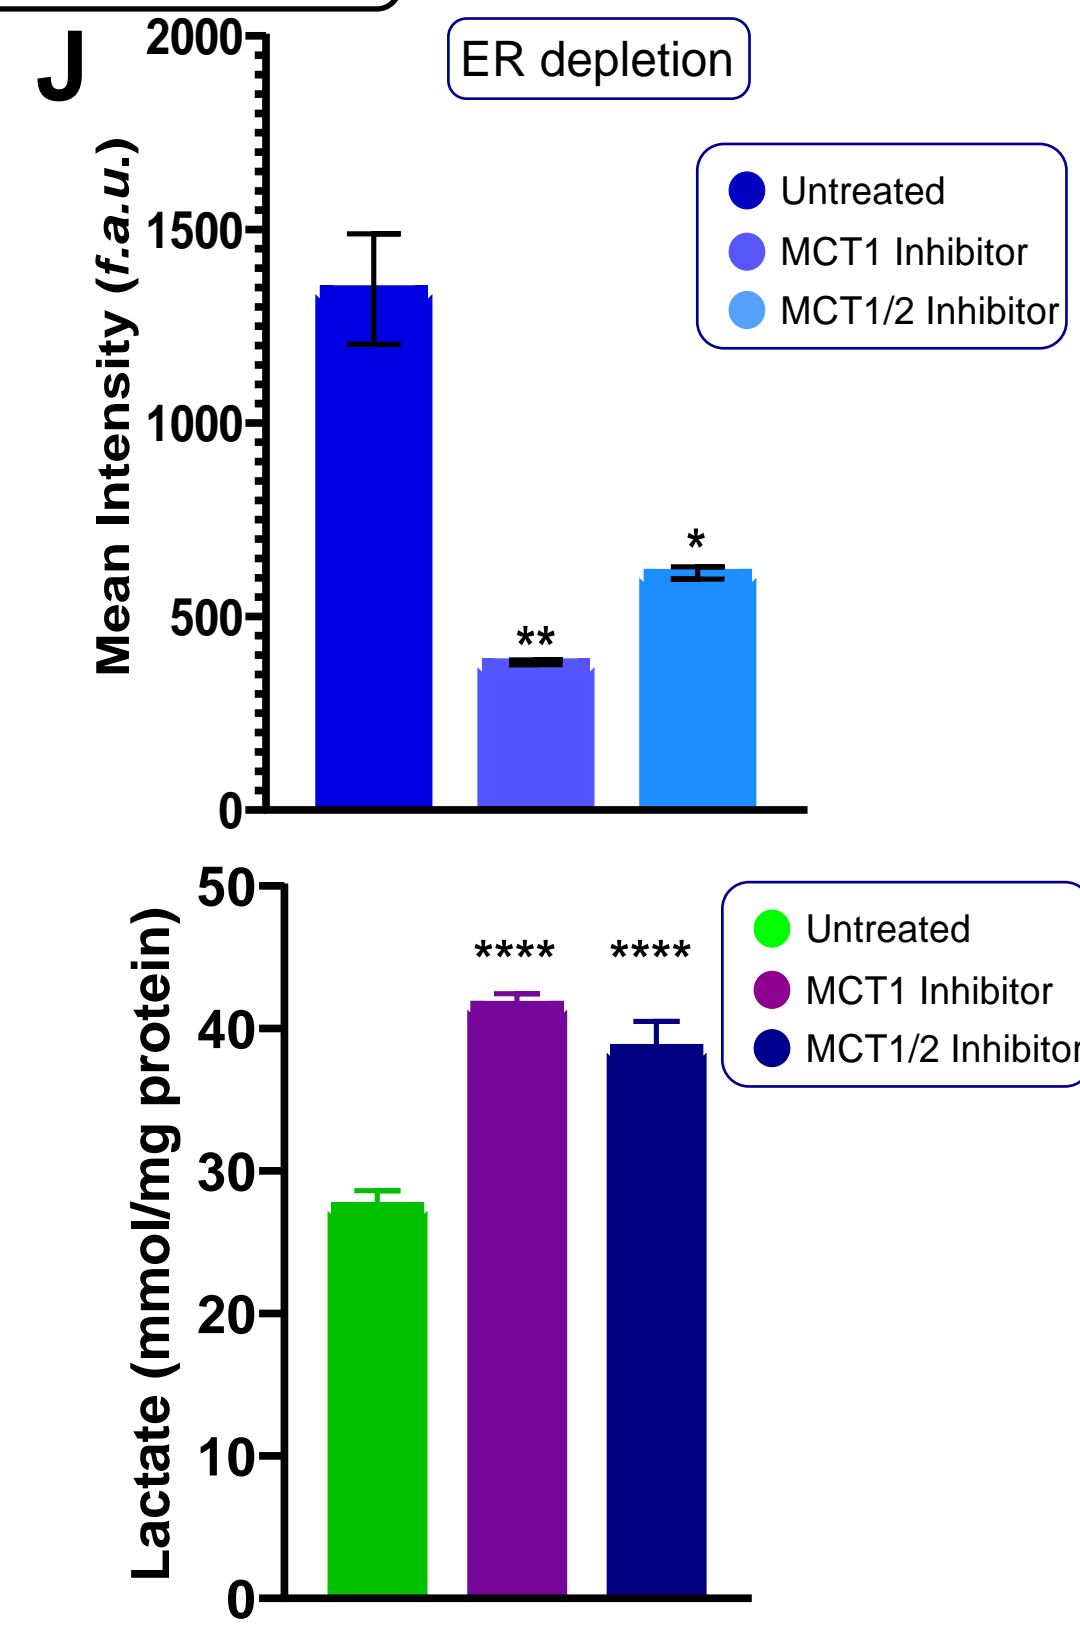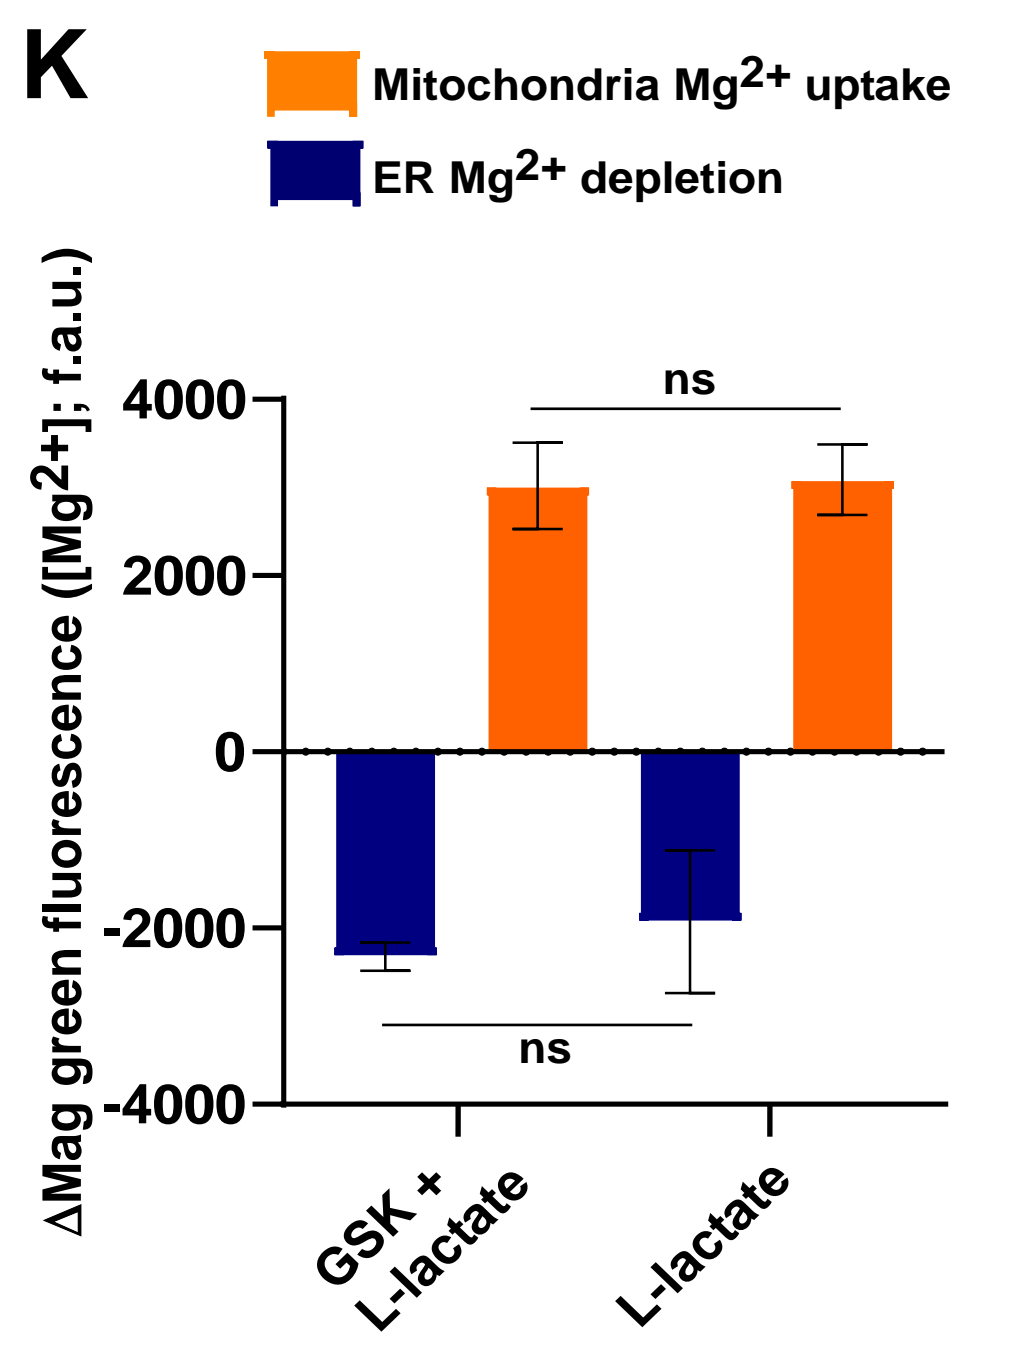

Supplement: NIHMS1626797-supplement-6.pdf [file NIHMS1626797-supplement-6.pdf]
